# Supplementary material for: Range Size and Niche Breadth as Predictors of Climate-Induced Habitat Change in Epipactis (Orchidaceae)
Source: Frontiers journal article supplement (doi:10.3389/fevo.2022.894616), 2022-04-15
Supplement: Data_Sheet_3.docx [file Data_Sheet_3.docx]

Evans & Jacquemyn. Range size and niche breadth as predictors of climate-induced habitat change in Epipactis (Orchidaceae).

Supplementary file

GBIF accession DOIs for raw occurrence data

E. albensis: https://doi.org/10.15468/dl.21fhx2, 14 Jun 2019

E. atrorubens: https://doi.org/10.15468/dl.8kls5q, 14 Jun 2019

E. dunensis: https://doi.org/10.15468/dl.xnceaw, 13 Jan 2020

E. fageticola: https://doi.org/10.15468/dl.dtlv5o, 14 Jun 2019

E. helleborine: https://doi.org/10.15468/dl.aicdym, 1 Jul 2019

E. kleinii: https://doi.org/10.15468/dl.jhucjg, 14 Jun 2019

E. leptochila: https://doi.org/10.15468/dl.o0lsxl, 14 Jun 2019

E. lusitanica: https://doi.org/10.15468/dl.zyio7o, 13 Jan 2020

E. microphylla: https://doi.org/10.15468/dl.zrwah5, 13 Jun 2019

E. muelleri: https://doi.org/10.15468/dl.gkcadj, 14 Jun 2019

E. palustris: https://doi.org/10.15468/dl.4ob1do, 13 Jun 2019

E. phyllanthes: https://doi.org/10.15468/dl.xmoewx, 14 Jun 2019

E. purpurata: https://doi.org/10.15468/dl.4wzvzg, 14 Jun 2019

E. tremolsii: https://doi.org/10.15468/dl.spzmui, 14 Jun 2019
